# Supplementary material for: Design of self-assembled glycopolymeric zwitterionic micelles as removable protein stabilizing agents
Source: Royal Society of Chemistry journal article supplement (doi:10.1039/d3na00002h), 2023-01-01
Supplement: d3na00002h1.pdf [file d3na00002h1.pdf]

## Electronic Supplementary information

### Design of self-assembled glycopolymeric zwitterionic micelles as removable protein stabilizing agents

*R. Rajan\*, and K. Matsumura\**

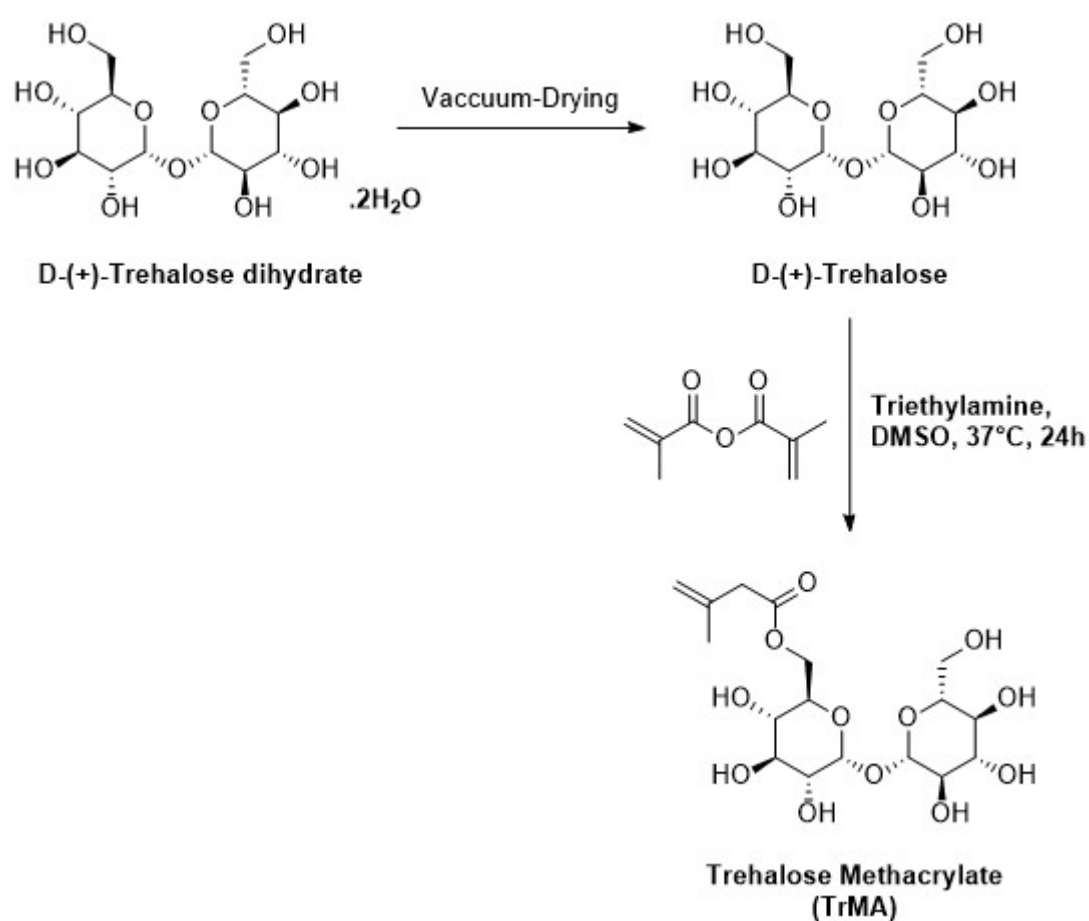

**Scheme S1.** Synthesis of trehalose methacrylate. Methacrylic anhydride was added to dried trehalose to substitute hydroxyl groups for a polymerizable methacrylate group.

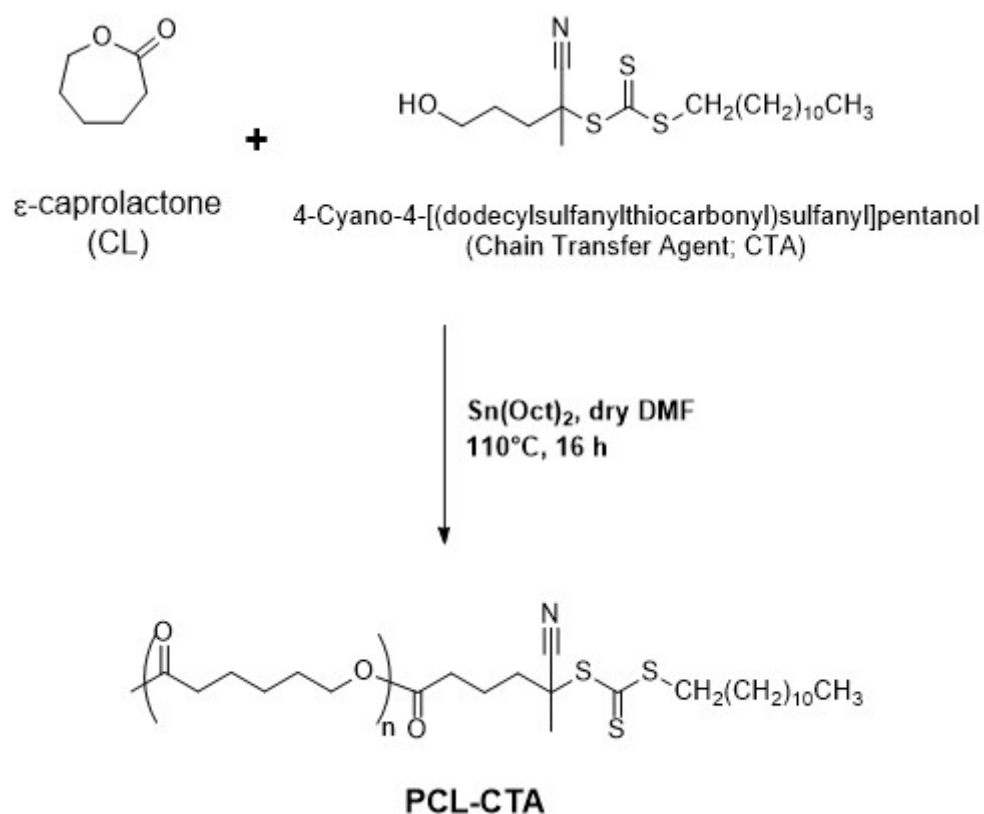

**Scheme S2. Synthesis of poly-caprolactone (PCL).** Ring opening polymerization of caprolactone using hydroxyl-terminated reversible addition–fragmentation chain-transfer (RAFT) agent in the presence of stannous(II) octoate.

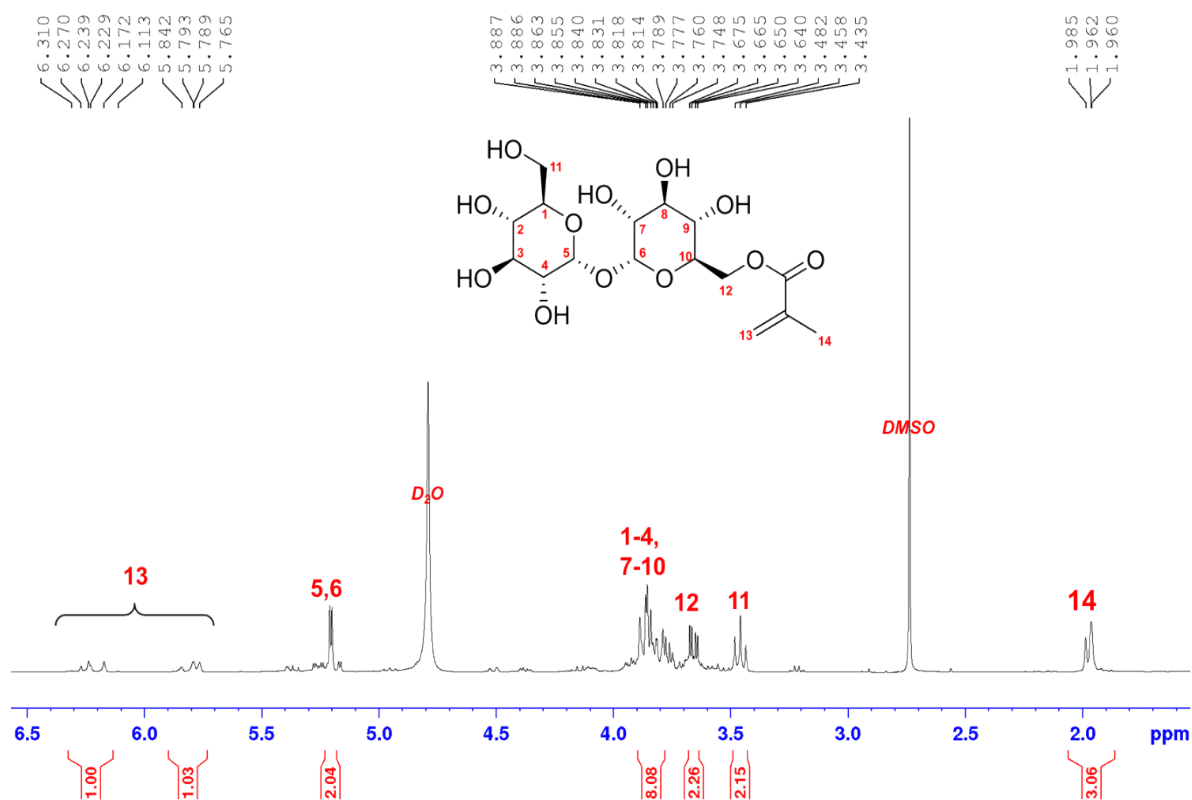

**Fig. S1.**  $^1\text{H}$  NMR spectrum of TrMA in  $\text{D}_2\text{O}$ .

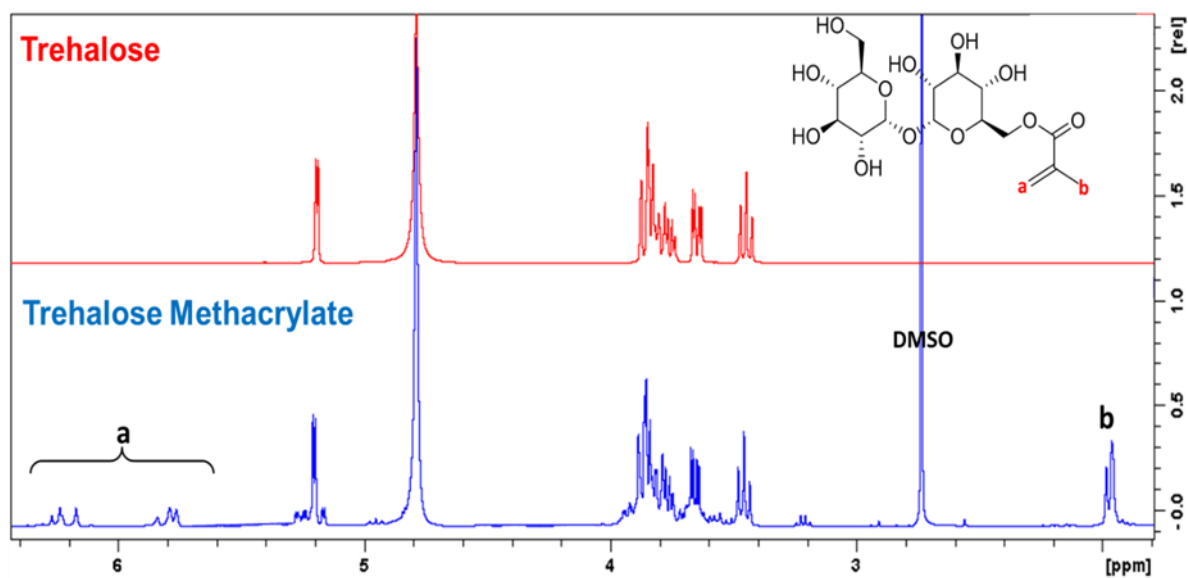

**Fig. S2.** Comparison of the  $^1\text{H}$  NMR spectra (in  $\text{D}_2\text{O}$ ) of trehalose and TrMA.

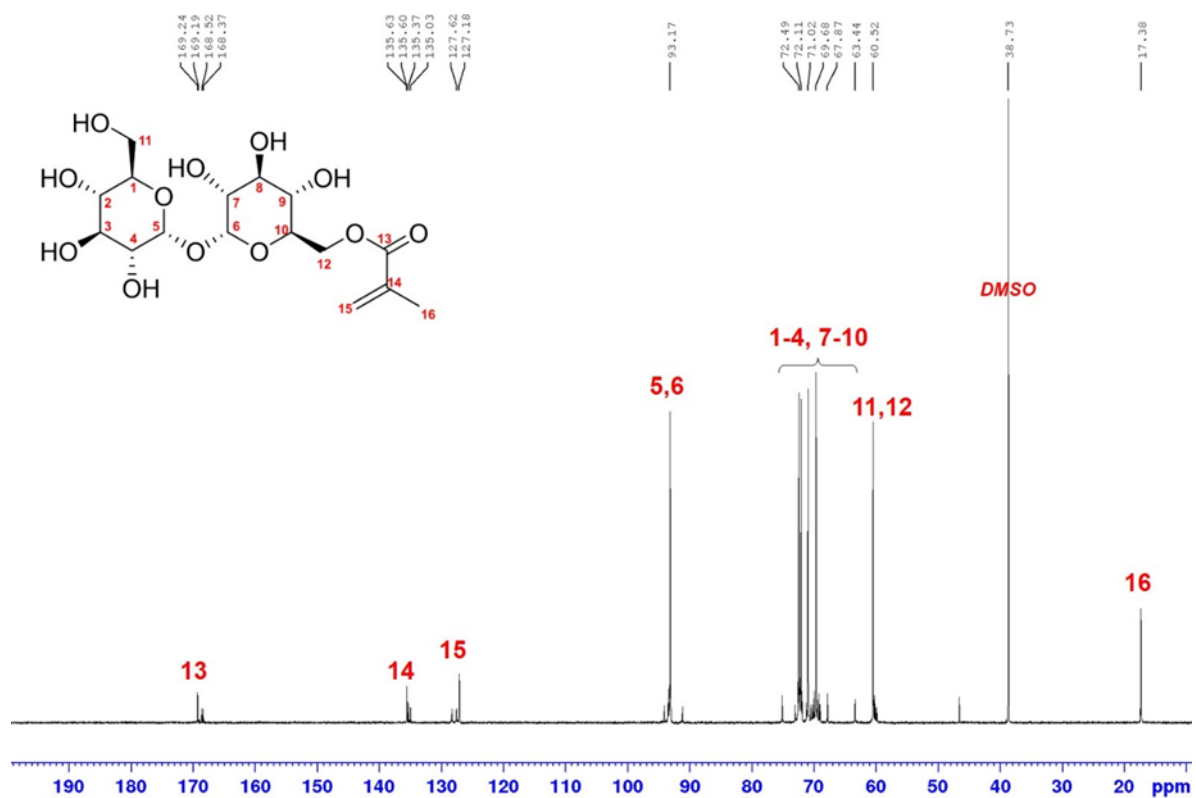

**Fig. S3.**  $^{13}\text{C}$  NMR spectrum of TrMA in  $\text{D}_2\text{O}$ .

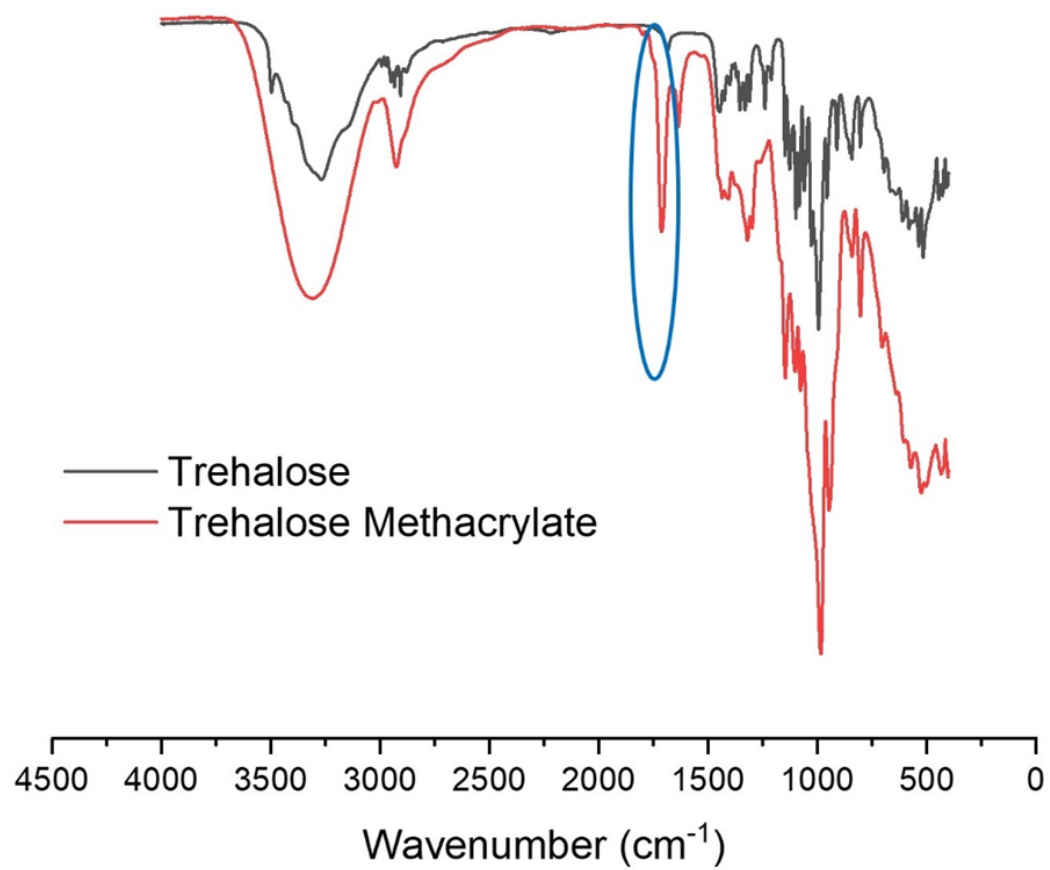

**Fig. S4.** Comparison of the FTIR spectra of trehalose and TrMA.

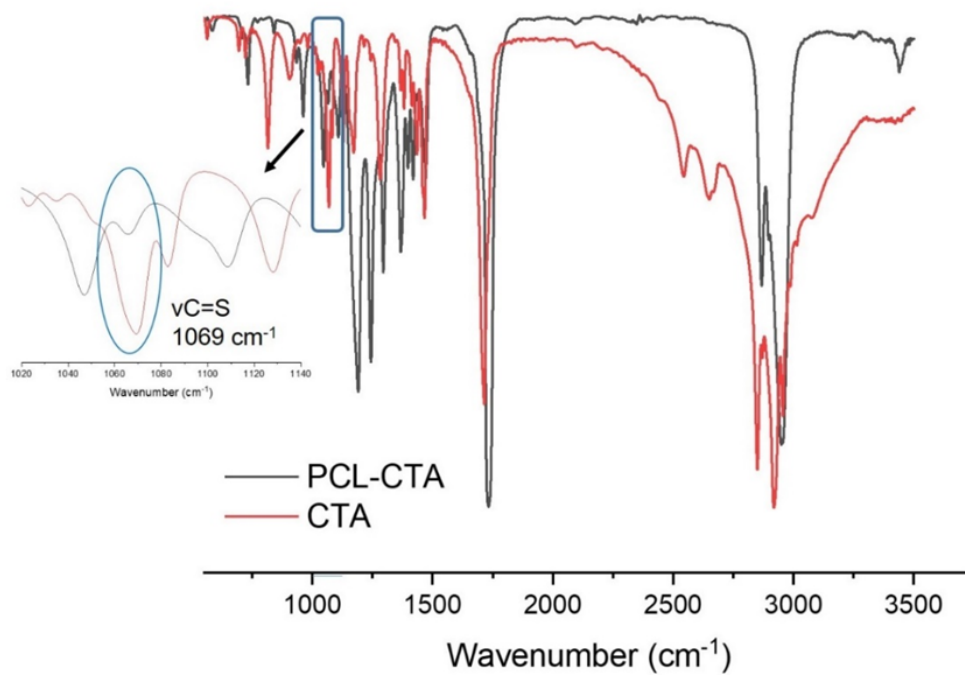

**Fig. S5.** Comparison of the FTIR spectra of PCL-CTA and CTA.

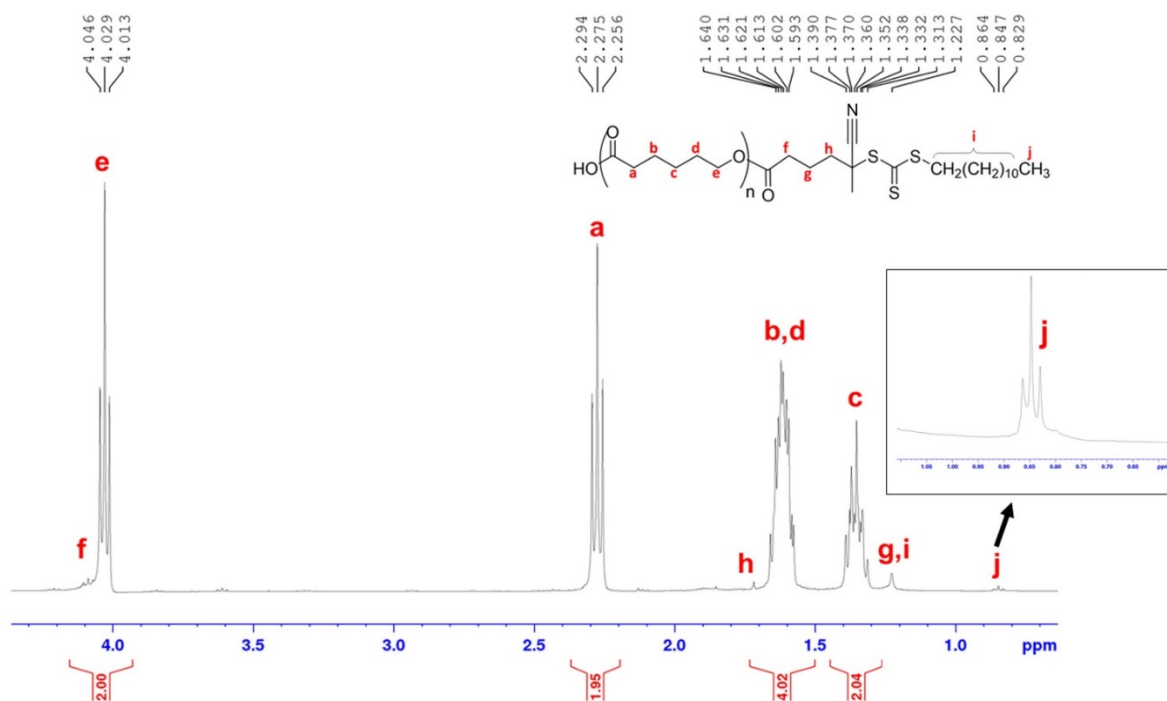

**Fig. S6.**  $^1\text{H}$  NMR of PCL-CTA in  $\text{CDCl}_3$ .

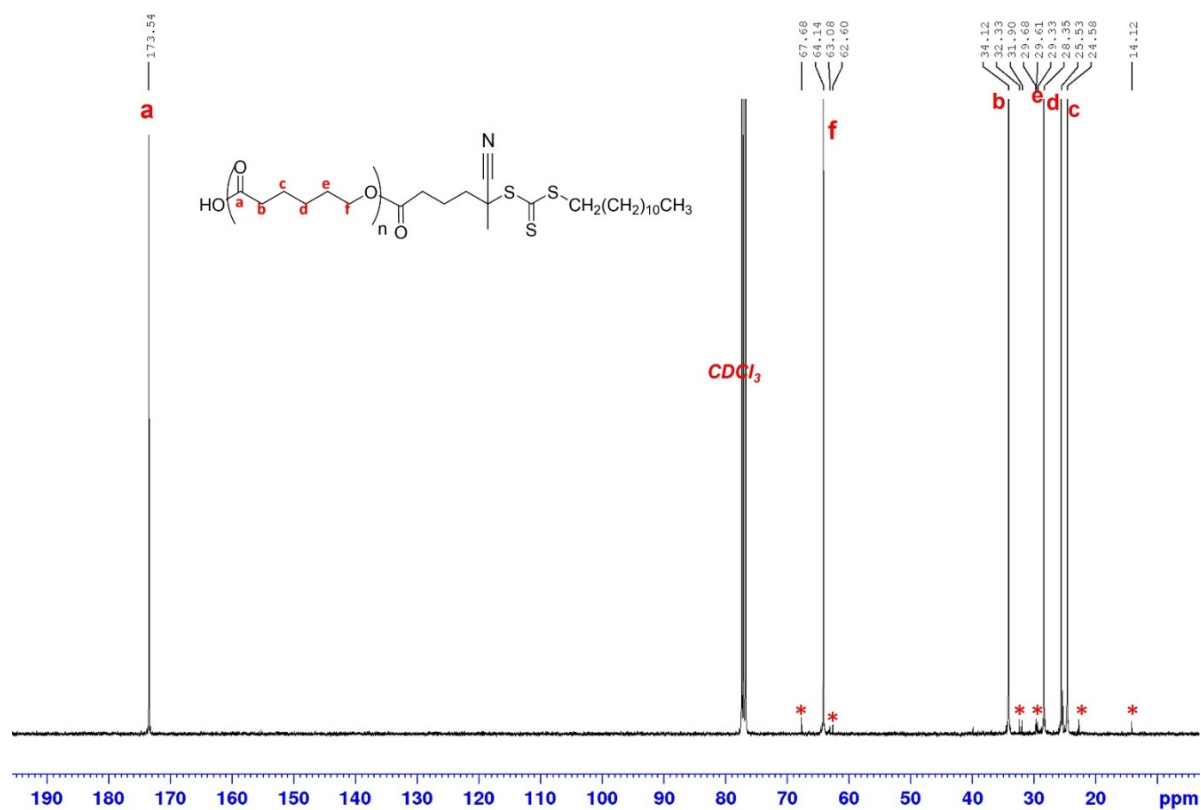

**Fig. S7.** <sup>13</sup>C NMR spectrum of PCL-CTA in CDCl<sub>3</sub> (\* indicates RAFT agent peaks).

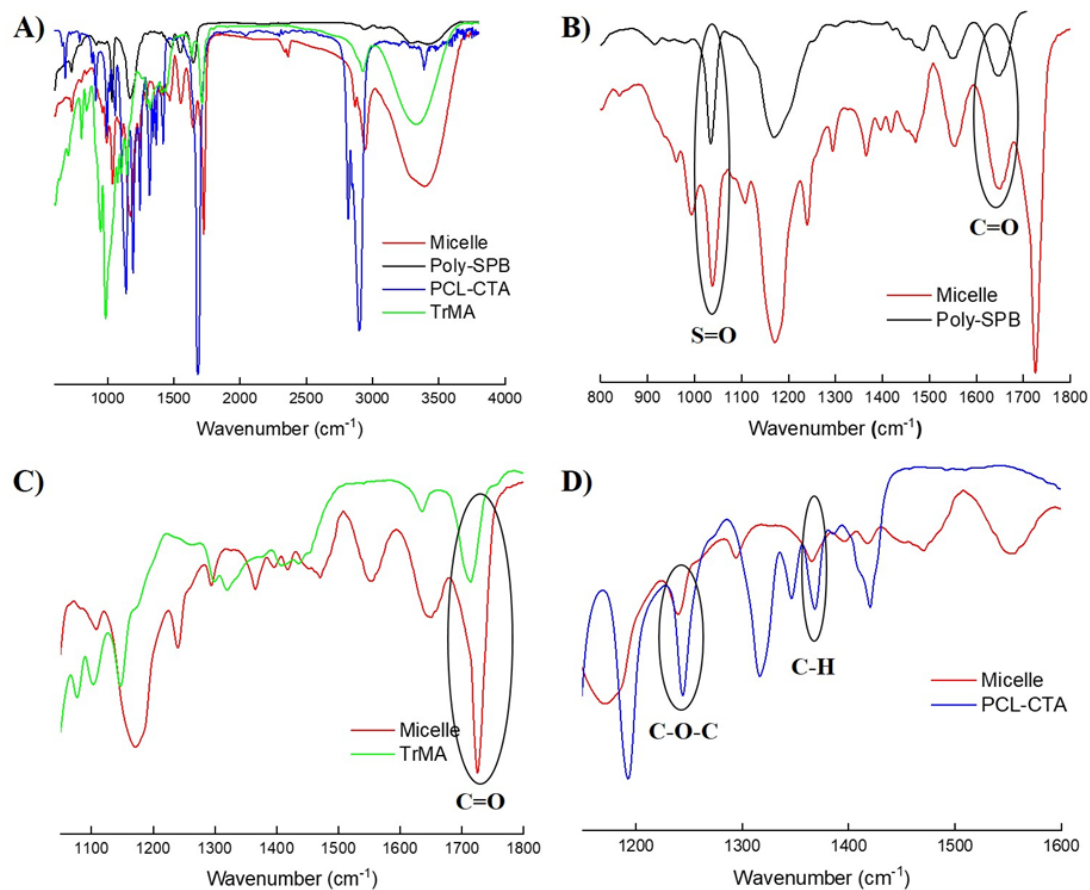

**Fig. S8.** Investigating the presence of all three components in the micelles. FTIR spectra of micelle and A) its corresponding components, B) poly-SPB, C) trehalose methacrylate, and D) PCL-CTA.



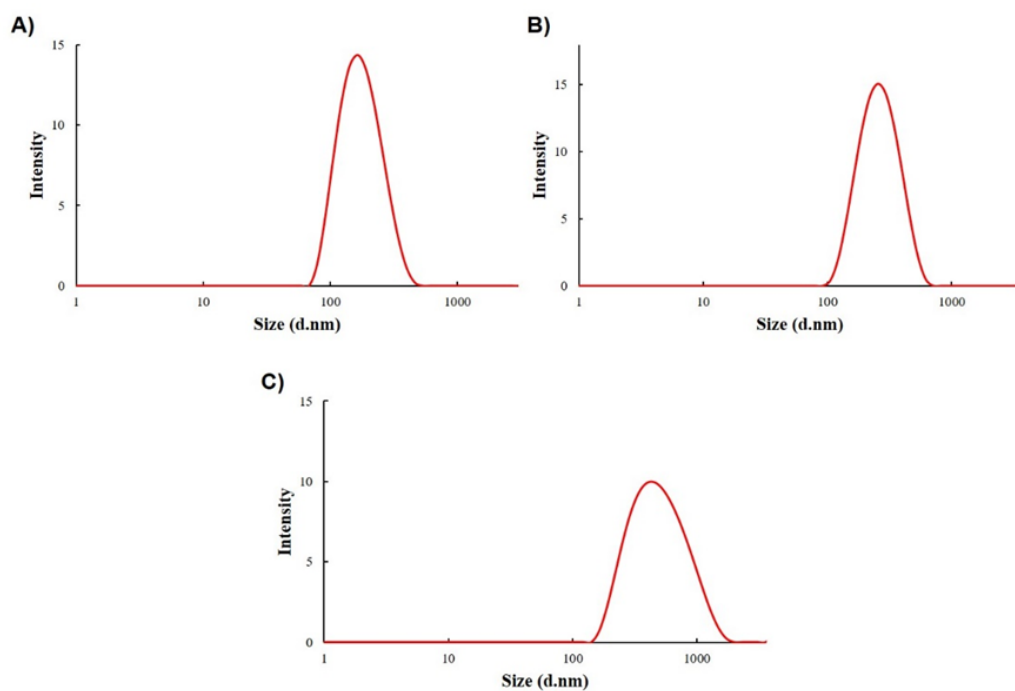

**Fig. S9.** Size of micelles. Size distribution by number obtained for the micelles by dynamic light scattering (DLS) for A) M1, B) M2, and C) M3.

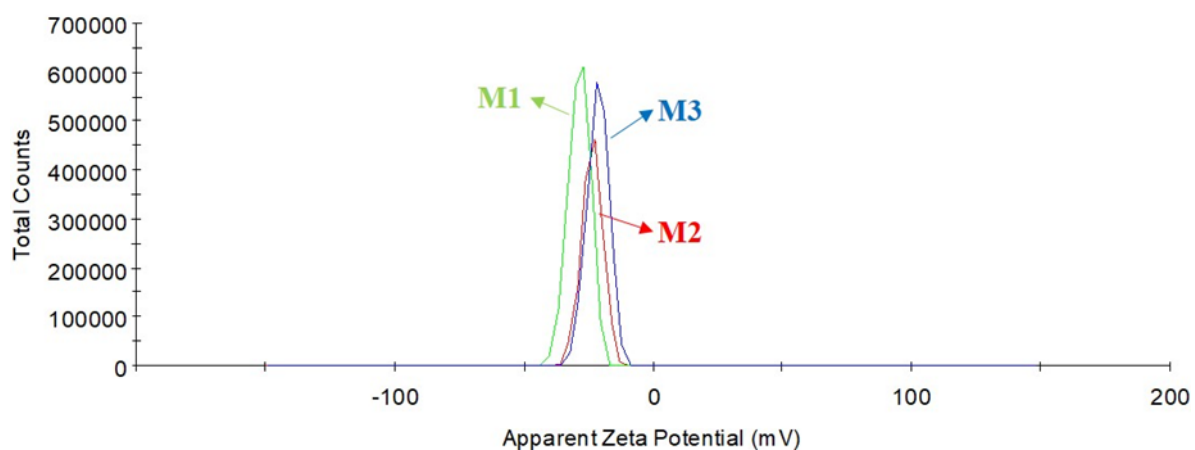

**Fig. S10.** Surface charge of micelles. Zeta potential distributions of the micelles were observed at 4 mg/mL in deionized water.

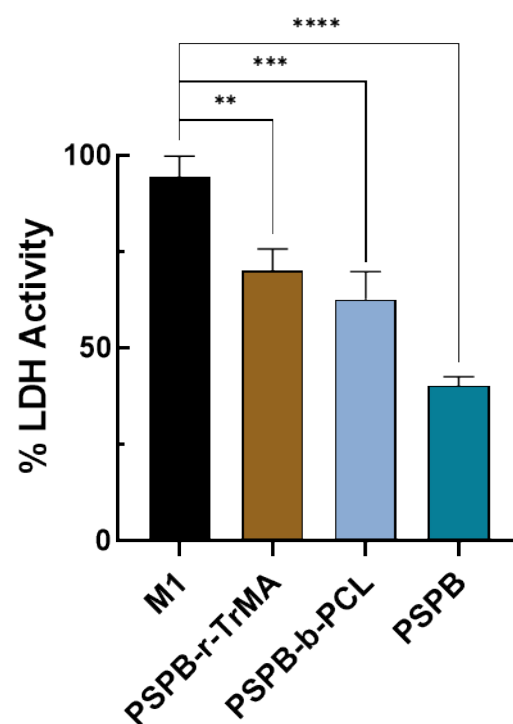

**Fig. S11.** Residual enzymatic activity. Enzymatic activity of LDH after incubation in presence of different additives (2 mg/mL) after incubation at 37 °C for 1 h.

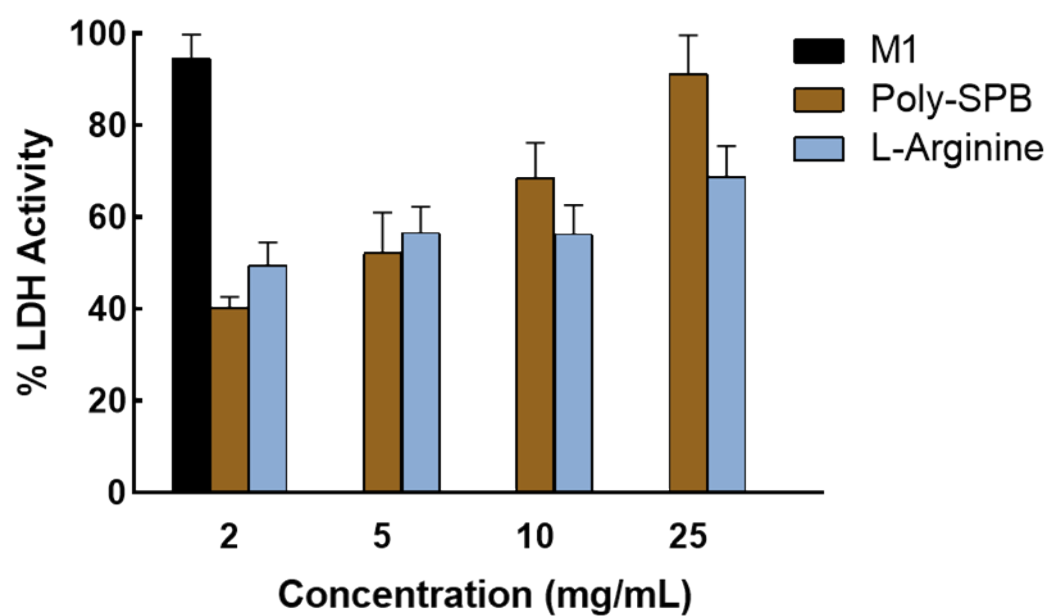

**Fig. S12.** Residual enzymatic activity. Enzymatic activity of LDH after incubation in the presence of different additives at different concentrations after incubation at 37 °C for 1 h.

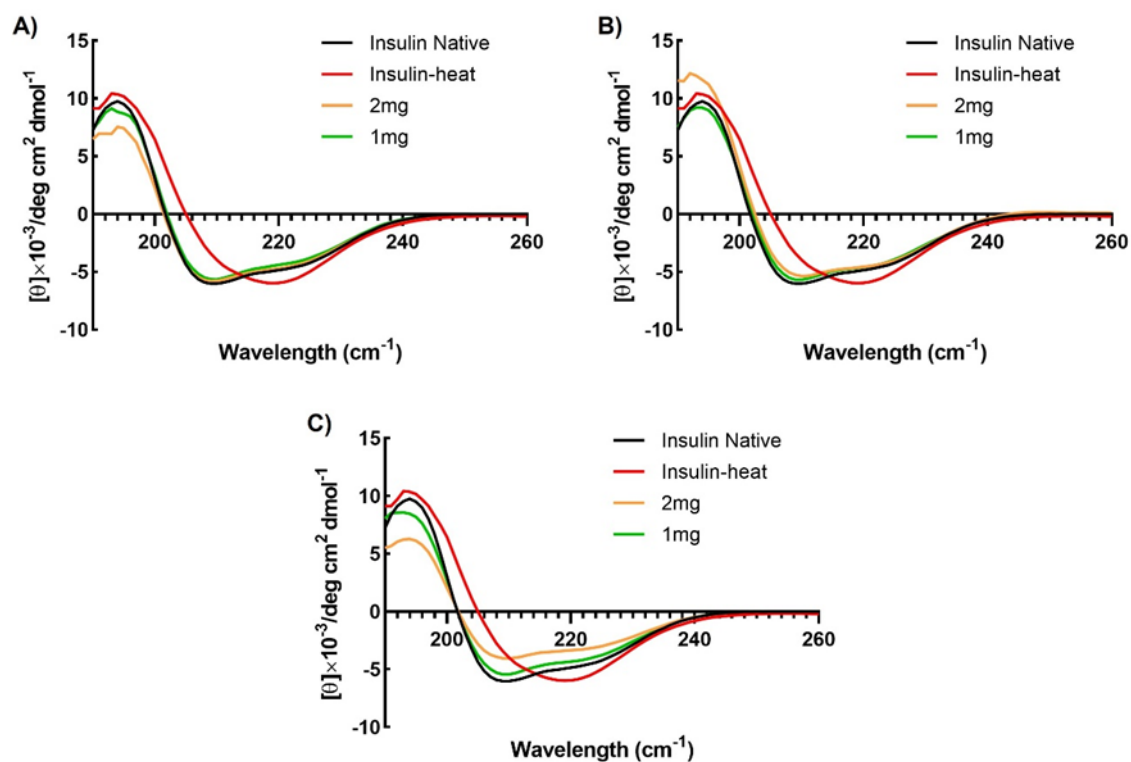

**Fig. S13.** Secondary structure of insulin. Representative far-UV CD spectra of human insulin after incubation at 45 °C for 72 h in the presence of A) M1, B) M2, and C) M3.

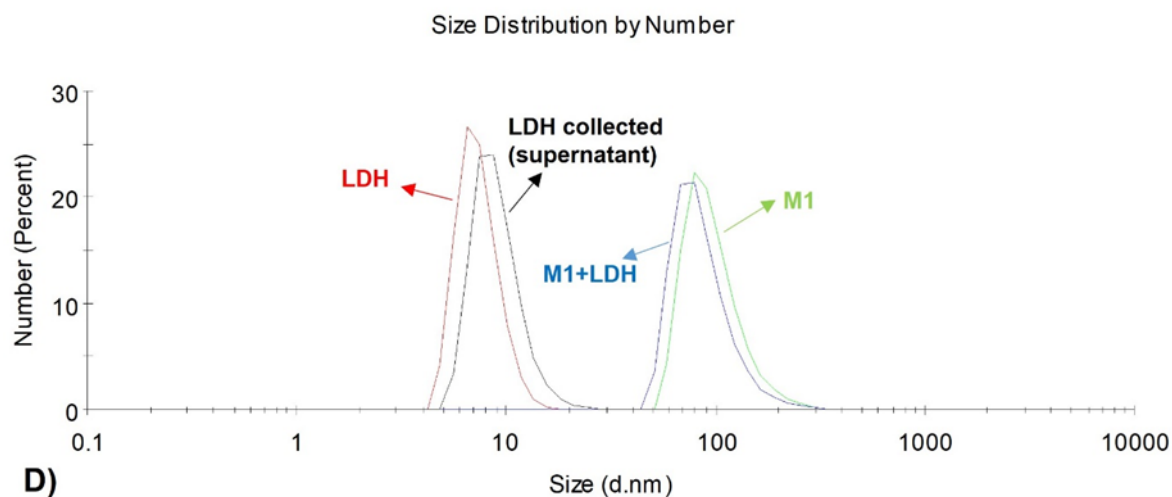

**Fig. S14.** Removal of micelles from protein. DLS analysis of micelles before and after centrifugation.

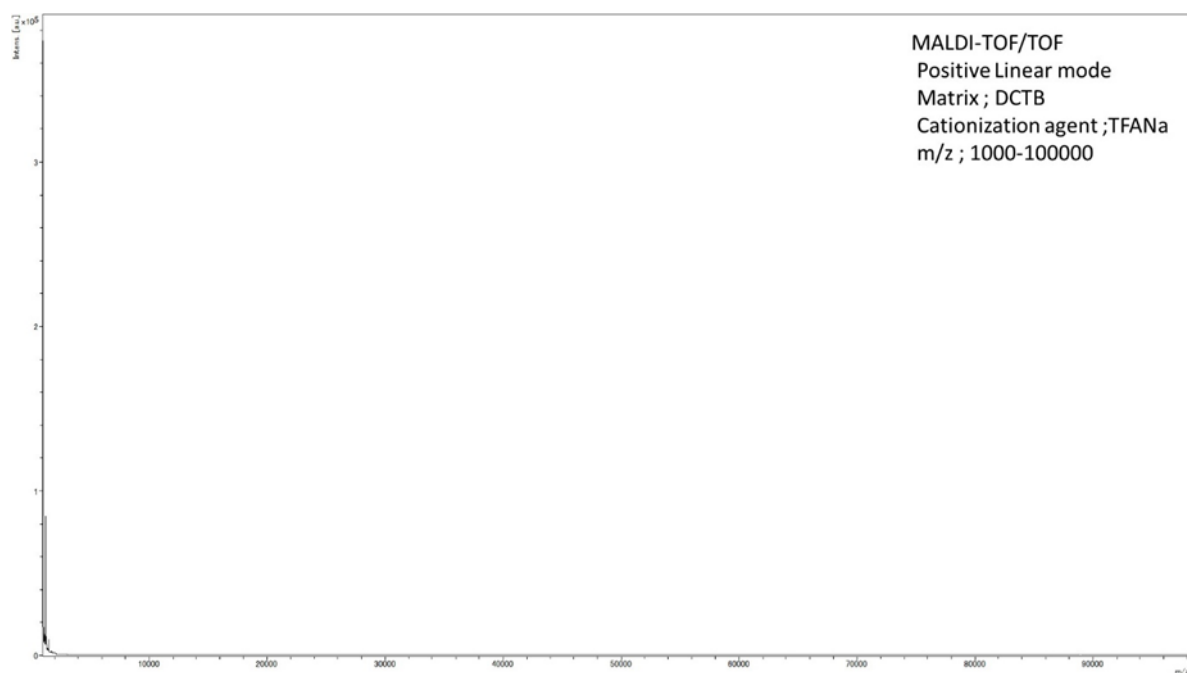

**Fig. S15.** Removal of micelles from protein. MALDI-TOF analysis of the supernatant recovered after centrifugation of micelles.

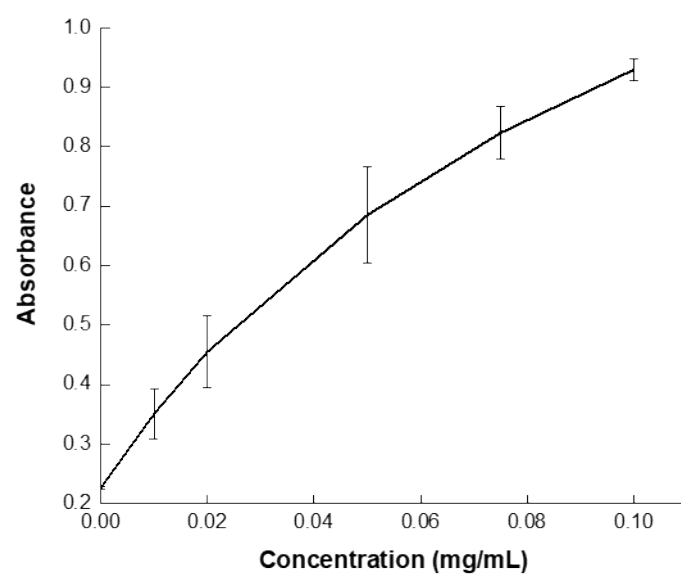

**Fig. S16.** LDH calibration curve. Bradford assay standard curve of LDH concentration versus absorbance (595 nm).

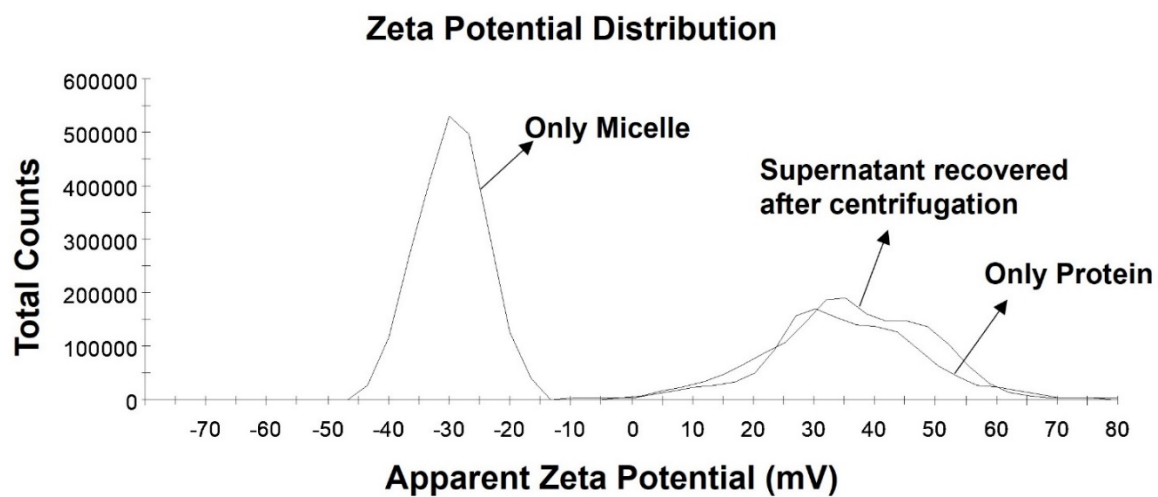

**Fig. S17.** Removal of micelles from protein. Zeta potential analysis of micelles before and after centrifugation.

**Table S1.** Summary of the recovery rates of LDH after ultracentrifugation.

|           | Protein recovered ( $\mu\text{g}$ ) | Recovery rate (%) |
|-----------|-------------------------------------|-------------------|
| <b>M1</b> | 65.66                               | $91.55 \pm 2.83$  |
| <b>M2</b> | 64.31                               | $92.75 \pm 1.87$  |
| <b>M3</b> | 63.66                               | $94.87 \pm 1.29$  |

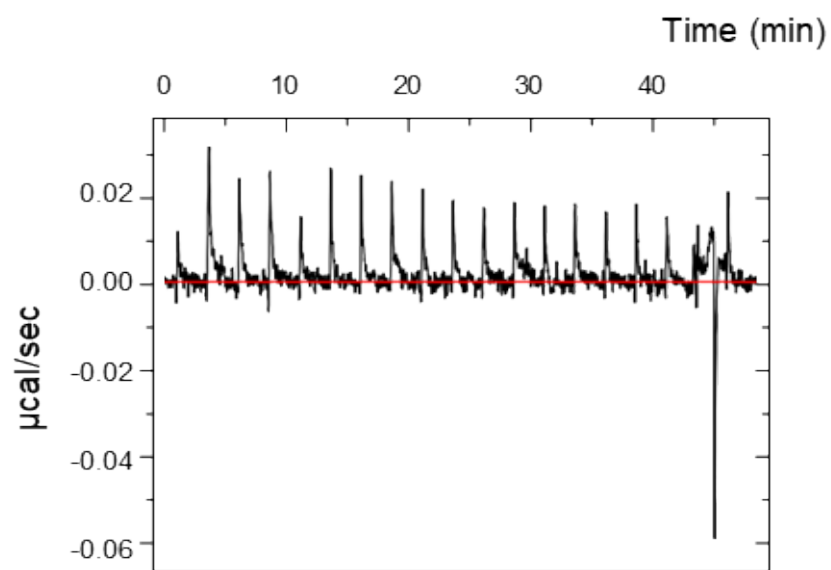

**Fig. S18.** Isothermal titration calorimetry results of the interaction between poly-SPB and insulin at 25°C.



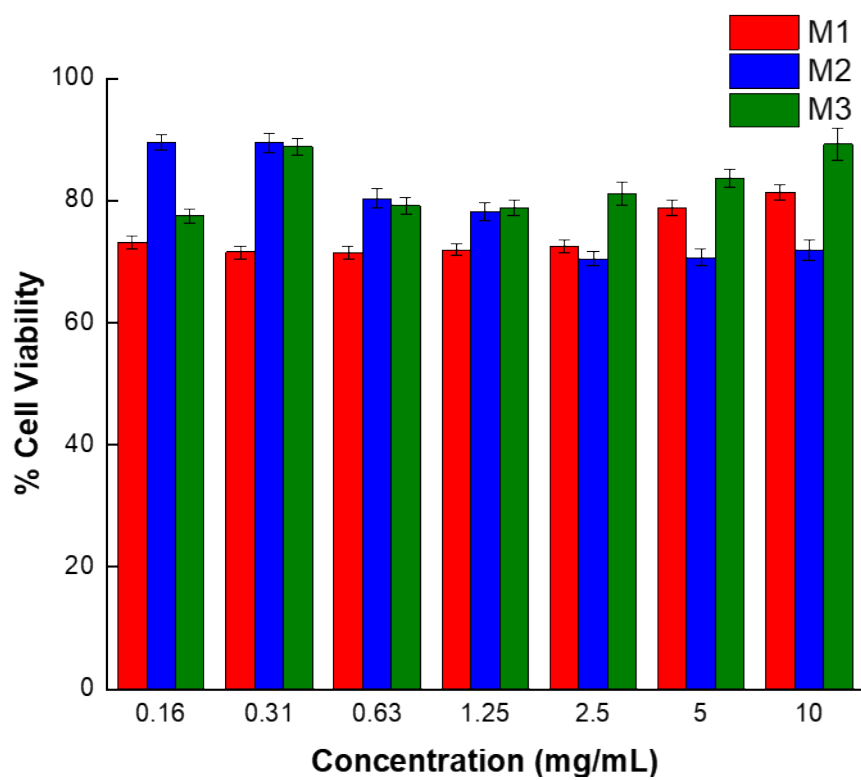

**Fig. S19.** Cytotoxicity of the micelles. The viabilities of L929 cells were tested after 24 h of treatment with different concentrations of micelles by MTT assay. Error bars indicate standard deviation of the mean.
